# Supplementary material for: Preparation, performance and mechanism of metal oxide modified catalytic ceramic membranes for wastewater treatment
Source: Royal Society of Chemistry journal article supplement (doi:10.1039/d3ra01291c), 2023-01-01
Supplement: d3ra01291c1.pdf [file d3ra01291c1.pdf]

## Supplementary Information

### Preparation, Performance and Mechanism of Metal Oxides Modified Catalytic Ceramic Membranes for Wastewater Treatment

Yangbo Huang<sup>a,b,\*</sup>, Zeyu Guan<sup>a</sup>, Qiang Li<sup>a</sup>, Qian Li<sup>c</sup>, Dongsheng Xia<sup>a,b</sup>

<sup>a</sup> School of Environmental Engineering, Wuhan Textile University, Wuhan, Hubei 430073, China

<sup>b</sup> Engineering Research Center for Clean Production of Textile Dyeing and Printing, Ministry of Education, Wuhan, Hubei 430073, China

<sup>c</sup> China Three Gorges Corporation, Wuhan 430014, China

\*Corresponding author: [ybhuang@wtu.edu.cn](mailto:ybhuang@wtu.edu.cn)

#### List of Tables and Figures

**Text S1** The possible catalytic mechanism for PMS activation in different CM/PMS systems

**Table S1** Characteristics of the virgin ceramic membrane

**Table S2** Surface element compositions of the pristine and modified membranes

**Table S3** Cross-section element compositions of the pristine and modified membranes

**Table S4** Comparison of the literature with this work on degradation efficiency of phenol by catalytic membranes

**Fig. S1** Procedures for the preparation of modified CMs.

**Fig. S2** The XRD analysis of metal oxides. (a) cobalt oxide, (b) manganese oxide, (c) iron oxide and (d) copper oxide.

**Fig. S3** Phenol removal efficiency by PMS direct oxidation, CM adsorption or a combination of both.

**Fig. S4** Liquid chromatograms of phenol in the pristine CM/PMS system and the standard samples.

**Fig. S5** Comparison of the phenol and TOC removal rate in the four membrane systems

**Fig. S6** The linear correlation between  $\ln(k_{obs})$  and  $\ln(\text{concentration})$  in the kinetic study. (a) PMS concentration, (b) Phenol concentration.

**Fig. S7** Quenching experiments of (a) MnCM, (b) FeCM and (d) CuCM.

**Fig. S8** Mass spectrograms of phenol degradation at 5 min

**Text S1** The possible catalytic mechanism for PMS activation in different CM/PMS systems

CuCM activated PMS for phenol removal based on a series of reactions as Eq. (1)~(4). With the addition of PMS,  $\text{HSO}_5^-$  could replace some surface  $-\text{OH}$  to bond with the metal sites of the oxides via ligand displacement, giving rise to the formation of  $\text{Cu(II)}-(\text{HO})\text{OSO}_3^-$  [1]. The subsequent decomposition of surface  $\text{Cu(II)}-(\text{HO})\text{OSO}_3^-$  complex leads to the production of  $\text{SO}_4^{\cdot-}$  and  $\text{Cu(III)}$ . Afterwards,  $\text{Cu(III)}$  can further react with  $\text{HSO}_5^-$  to generate more sulfate radicals.

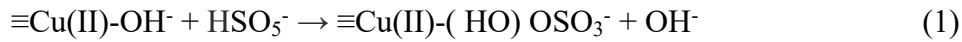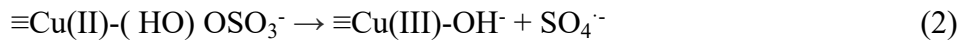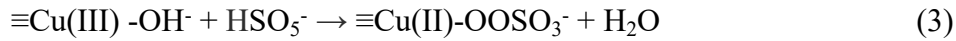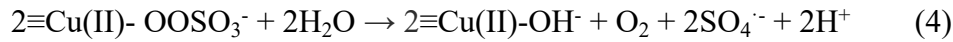

Similarly, the possible mechanism for PMS activation by MnCM was proposed in Eq. (5)~(8) [2].

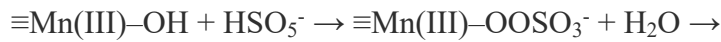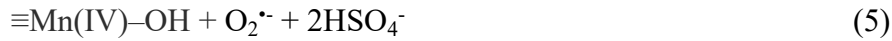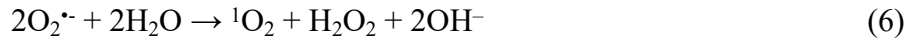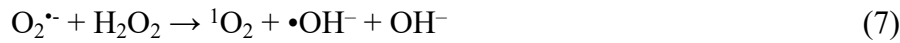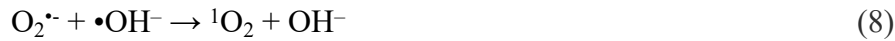

For FeCM, the possible mechanism of PMS activation was as follows [3]:

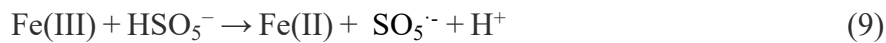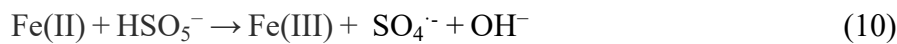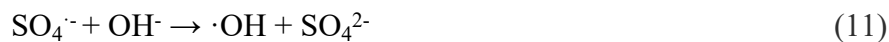

Table S1 Characteristics of the virgin ceramic membrane

| Components                                  | Description                              |
|---------------------------------------------|------------------------------------------|
| Support layer material                      | $\alpha$ -Al <sub>2</sub> O <sub>3</sub> |
| Membrane configuration                      | Flat membrane with circular multichannel |
| Effective filtration area / cm <sup>2</sup> | 16                                       |
| Surface pore size / $\mu$ m                 | 0.1                                      |
| Porosity                                    | 30% – 40%                                |

Table S2 Surface element compositions of the pristine and modified membranes

| Membrane    | Element weight percentage* wt% |       |      |      |      |      |
|-------------|--------------------------------|-------|------|------|------|------|
|             | Al                             | O     | Co   | Mn   | Fe   | Cu   |
| Pristine CM | 51.81                          | 48.19 | -    | -    | -    | -    |
| CoCM        | 51.74                          | 47.90 | 0.36 | -    | -    | -    |
| MnCM        | 52.23                          | 47.23 | -    | 0.55 | -    | -    |
| FeCM        | 53.33                          | 46.22 | -    | -    | 0.45 | -    |
| CuCM        | 50.02                          | 49.34 | -    | -    | -    | 0.64 |

\*The values were the average of the EDS results of five measurement points.

Table S3 Cross-section element compositions of the pristine and modified membranes

| Membrane    | Element weight percentage* wt% |       |      |      |      |      |
|-------------|--------------------------------|-------|------|------|------|------|
|             | Al                             | O     | Co   | Mn   | Fe   | Cu   |
| Pristine CM | 50.60                          | 49.40 | -    | -    | -    | -    |
| CoCM        | 50.10                          | 49.06 | 0.84 | -    | -    | -    |
| MnCM        | 48.75                          | 50.23 | -    | 1.02 | -    | -    |
| FeCM        | 49.80                          | 49.00 | -    | -    | 1.20 | -    |
| CuCM        | 49.13                          | 49.56 | -    | -    | -    | 1.31 |

\*The values were the average of the EDS results of five measurement points.

Table S4 Comparison of the literature with this work on degradation efficiency of phenol by catalytic membranes

| Catalytic membrane         | Pollutant      | Degradation efficiency under optimal condition | Reference    |
|----------------------------|----------------|------------------------------------------------|--------------|
| N-doped GO membrane        | 50 mg/L phenol | 94% after 180 min                              | S[4]         |
| Coal-based carbon membrane | 10 mg/L phenol | 100%                                           | S[5]         |
| rGO-PTFE membrane          | 50 mg/L phenol | 96% after 180 min                              | S[6]         |
| CoCM                       | 30 mg/L phenol | 100% after 30 min                              | In this work |
| MnCM                       | 30 mg/L phenol | 99% after 30 min                               | In this work |
| FeCM                       | 30 mg/L phenol | 87% after 30 min                               | In this work |
| CuCM                       | 30 mg/L phenol | 83% after 30 min                               | In this work |

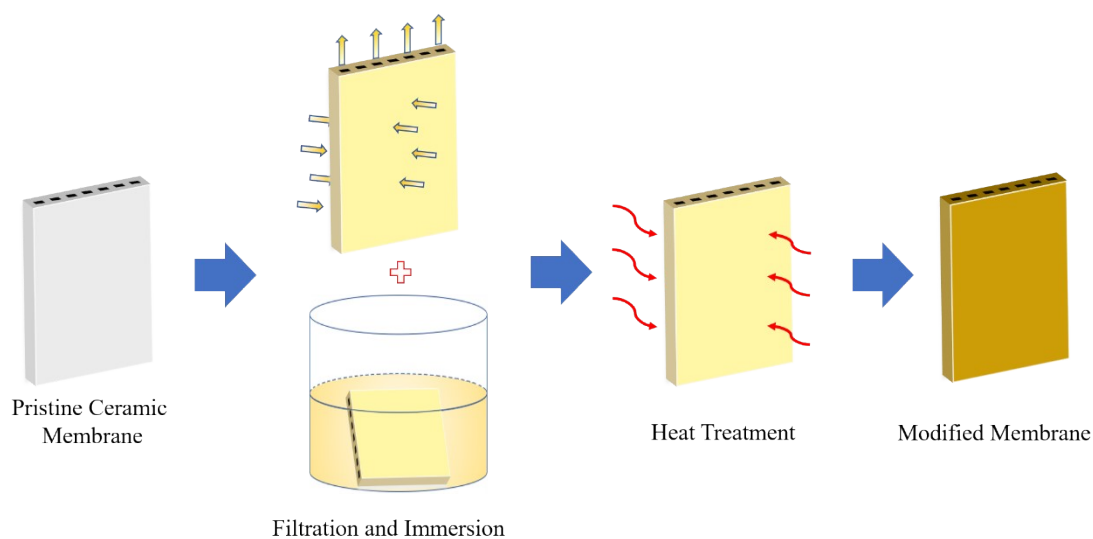

Fig. S1 Procedures for the preparation of modified CMs.

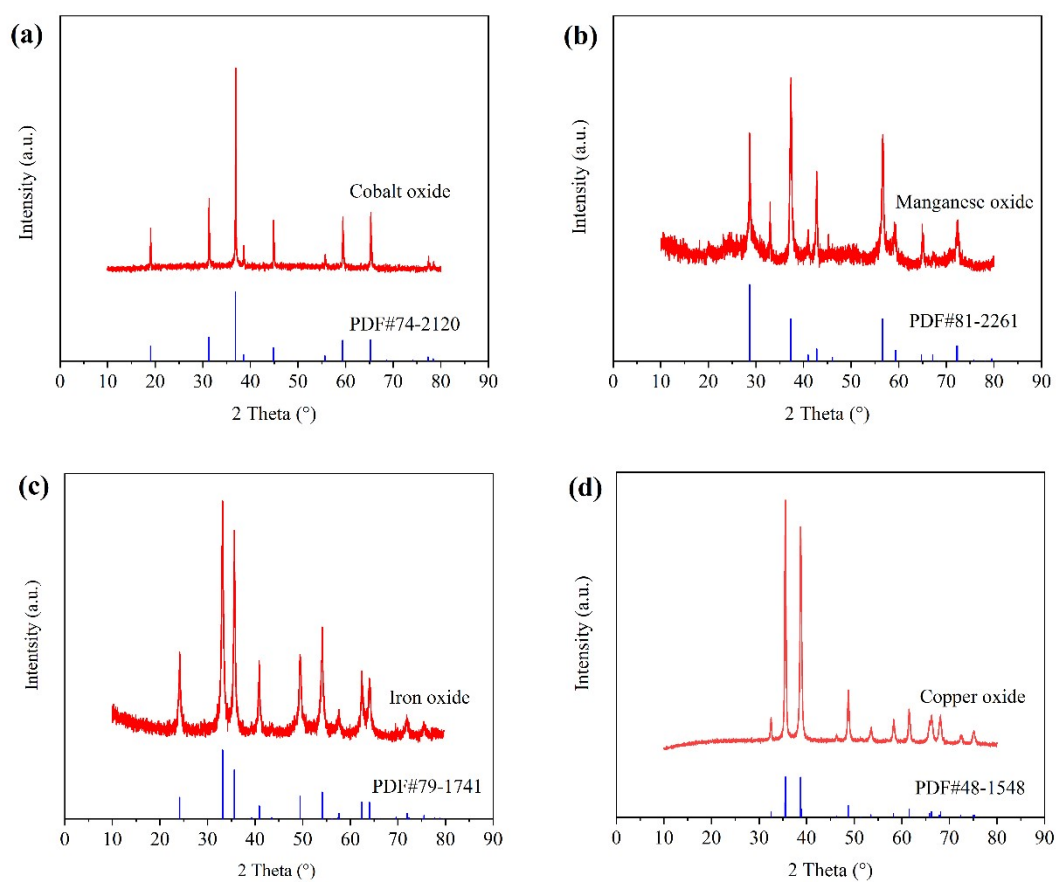

Fig. S2 The XRD analysis of metal oxides. (a) cobalt oxide, (b) manganese oxide, (c) iron oxide and (d) copper oxide.

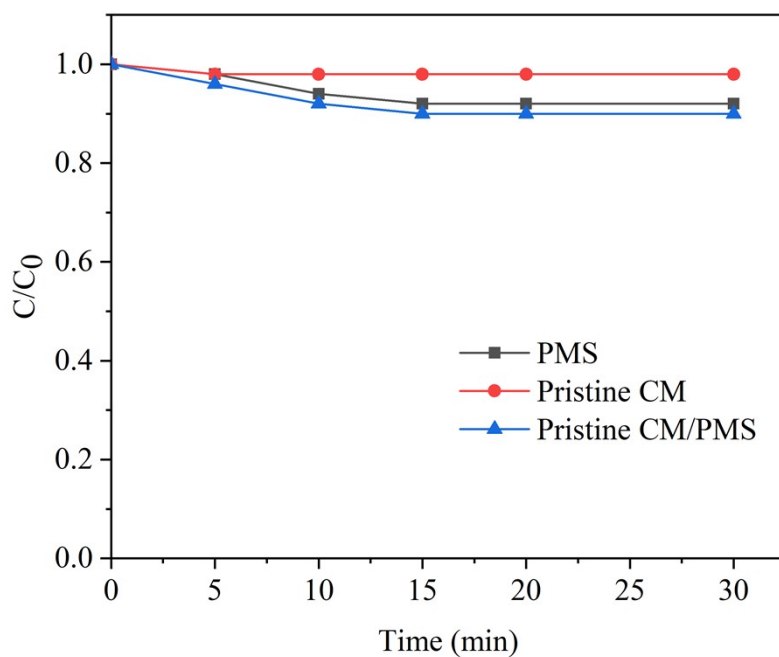

Fig. S3 Phenol removal efficiency by PMS direct oxidation, CM adsorption or a combination of both. Experimental conditions:  $C_{phenol} = 30$  mg/L,  $C_{PMS} = 2$  mM, pH=7, T=25°C.

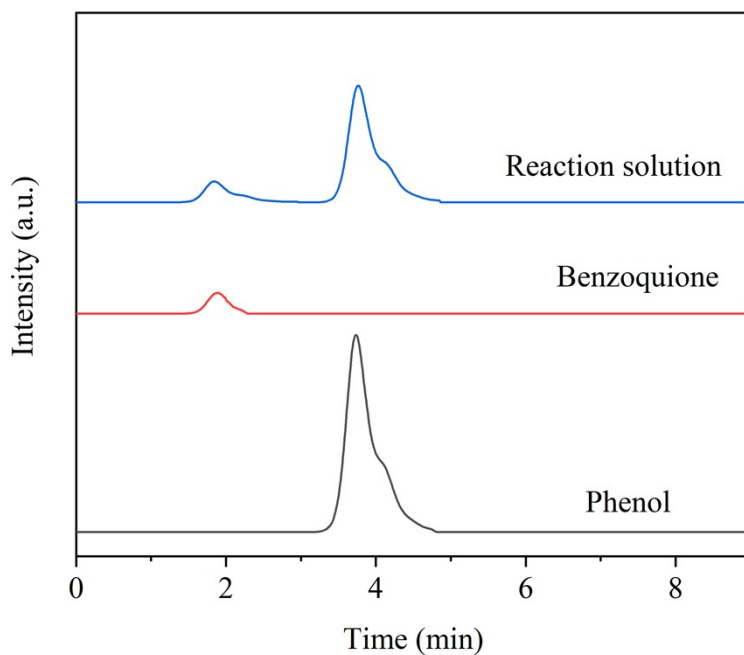

Fig. S4 Liquid chromatograms of phenol in the pristine CM/PMS system and the standard samples.

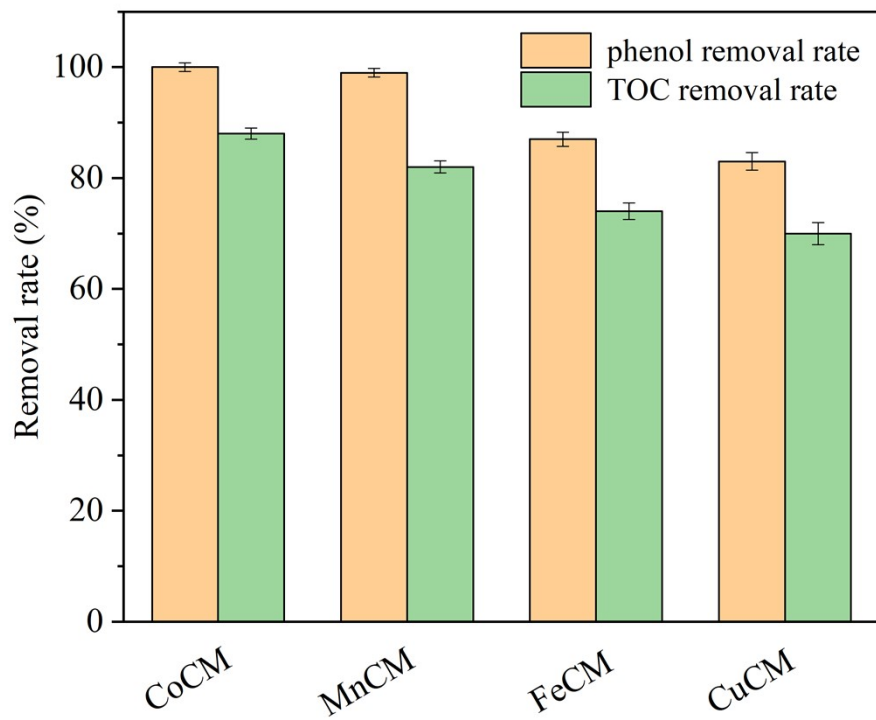

Fig. S5 Comparison of the phenol and TOC removal rate in the four membrane systems

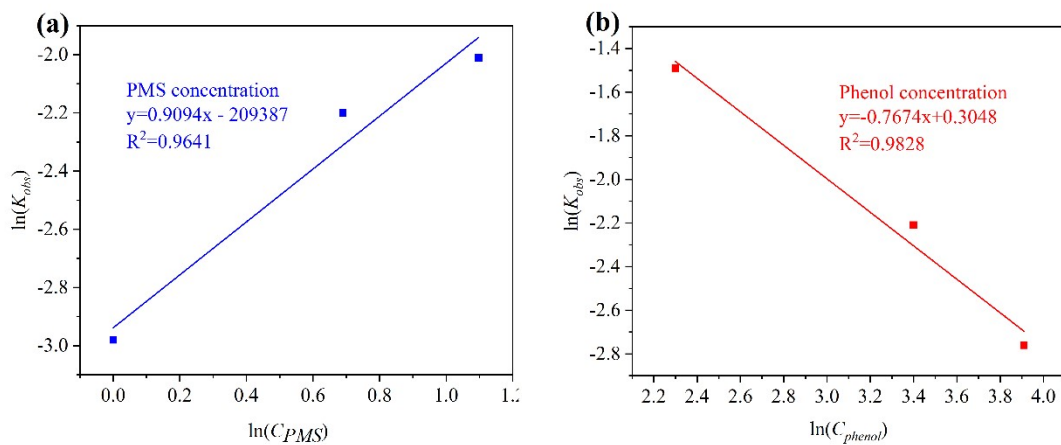

Fig. S6 The linear correlation between  $\ln(k_{obs})$  and  $\ln(\text{concentration})$  in the kinetic study. (a) PMS concentration, (b) Phenol concentration.

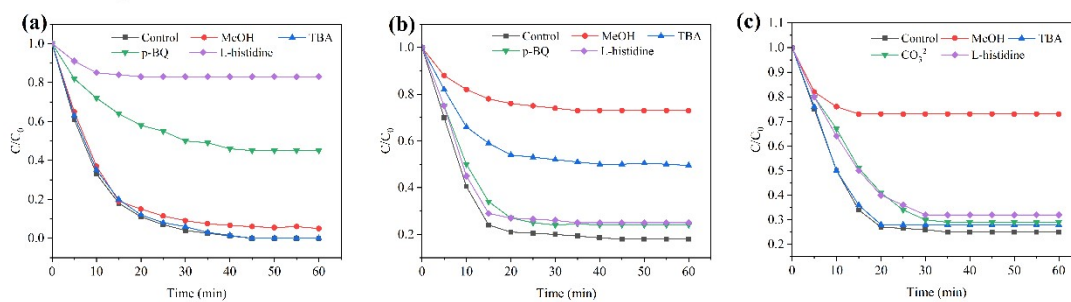

Fig. S7 Quenching experiments of (a) MnCM, (b) FeCM and (d) CuCM. Experimental conditions:  $C_{PMS} = 2$  mM,  $C_{PMS} = 30$  mg/L, pH=7.0,  $C_{MeOH} = 500$  mM,  $C_{TBA} = 500$  mM,  $C_{p-BQ} = 10$  mM,  $C_{L-histidine} = 20$  mM,  $C_{DMPO} = 100$  mM,  $C_{TEMP} = 100$  mM.

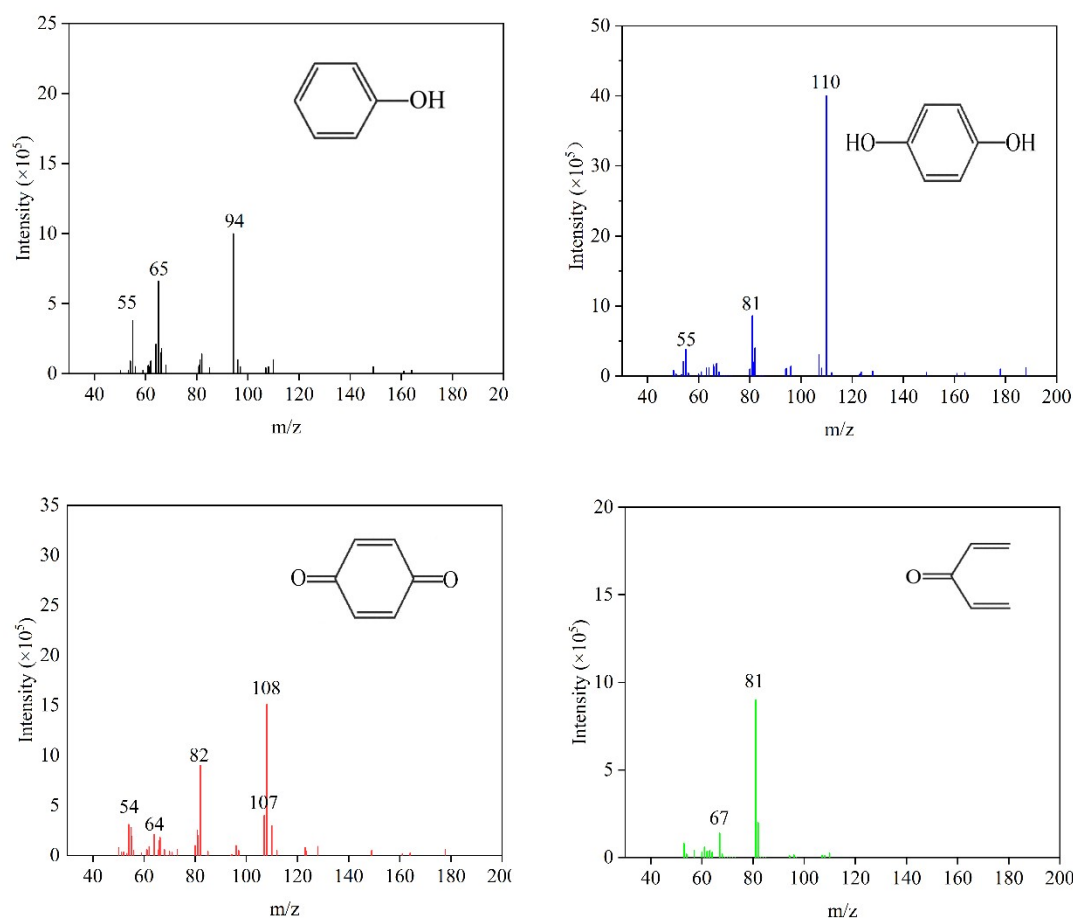

Fig. S8 Mass spectrograms of phenol degradation at 5 min. Experimental conditions:  $C_{PMS} = 2$  mM,  $C_{PMS} = 30$  mg/L, pH=7.0.

## References

S[1] S. Chen, X. Liu, S. Gao, Y. Chen, L. Rao, Y. Yao, Z. Wu, CuCo<sub>2</sub>O<sub>4</sub> supported on



activated carbon as a novel heterogeneous catalyst with enhanced peroxymonosulfate activity for efficient removal of organic pollutants, *Environ. Res.* 183 (2020) 109245.

S[2] L. Chen, T. Maqbool, W. Fu, Y. Yang, C. Hou, J. Guo, X. Zhang, Highly efficient manganese (III) oxide submerged catalytic ceramic membrane for nonradical degradation of emerging organic compounds, *Sep. Purif. Technol.* 295 (2022) 121272.

S[3] Y. Wang, D. Tian, W. Chu, M. Li, X. Lu, Nanoscaled magnetic  $\text{CuFe}_2\text{O}_4$  as an activator of peroxymonosulfate for the degradation of antibiotics norfloxacin, *Sep. Purif. Technol.* 212 (2019) 536-544.

S[4] M. Pedrosa, G. Drazic, P.B. Tavares, J.L. Figueiredo, A.M.T. Silva, Metal-free graphene-based catalytic membrane for degradation of organic contaminants by persulfate activation, *Chem. Eng. J.* 369 (2019) 223-232.

S[5] X. Fan, S. Li, M. Sun, C. Song, J. Xiao, J. Du, P. Tao, T. Sun, M. Shao, T. Wang, Degradation of phenol by coal-based carbon membrane integrating sulfate radicals-based advanced oxidation processes, *Ecotox. Environ. Safe.* 185 (2019) 109662.

S[6] M. Pedrosa, G. Drazic, P.B. Tavares, J.L. Figueiredo, A.M.T. Silva, Metal-free graphene-based catalytic membrane for degradation of organic contaminants by persulfate activation, *Chem. Eng. J.* 369 (2019) 223-232.
